# Supplementary material
Source: PubMed Central journal article supplement (PMC3177672)
Supplement: supp_mcr194_mcr194supp.pdf [file supp_mcr194_mcr194supp.pdf]

## SUPPLEMENTARY DATA

TABLE S1. The SSR markers used to analyze 431 *Olea europaea* samples, their size range, number of alleles, observed heterozygosity ( $H_o$ ), expected heterozygosity ( $H_e$ ), inbreeding coefficient ( $F$ ), null allele frequency ( $A_n$ ), polymorphic information content (PIC) and identity probability (IP)

| SSR           | Size range (bp) | Number of alleles | $H_e$ | $H_o$ | $F$    | $A_n$  | PIC   | IP       |
|---------------|-----------------|-------------------|-------|-------|--------|--------|-------|----------|
| ssrOeUA-DCA03 | 227-258         | 11                | 0.885 | 0.798 | -0.104 | -0.048 | 0.755 | 7.15E-02 |
| ssrOeUA-DCA09 | 160-208         | 21                | 0.954 | 0.863 | -0.077 | -0.037 | 0.865 | 2.68E-02 |
| ssrOeUA-DCA11 | 126-182         | 15                | 0.849 | 0.750 | -0.079 | -0.035 | 0.703 | 1.02E-01 |
| ssrOeUA-DCA13 | 114-154         | 8                 | 0.530 | 0.714 | 0.226  | 0.113  | 0.714 | 9.77E-02 |
| ssrOeUA-DCA15 | 243-267         | 4                 | 0.298 | 0.625 | 0.508  | 0.197  | 0.581 | 1.92E-02 |
| ssrOeUA-DCA16 | 122-216         | 31                | 0.964 | 0.856 | -0.088 | -0.042 | 0.865 | 2.63E-02 |
| ssrOeUA-DCA18 | 158-186         | 14                | 0.952 | 0.825 | -0.111 | -0.052 | 0.819 | 4.55E-02 |
| Gapu-59       | 194-229         | 10                | 0.698 | 0.640 | 0.000  | -0.001 | 0.594 | 1.79E-01 |
| Gapu-71B      | 114-141         | 7                 | 0.885 | 0.787 | -0.087 | -0.039 | 0.743 | 8.37E-02 |
| UDO99-011     | 103-137         | 12                | 0.924 | 0.836 | -0.066 | -0.031 | 0.813 | 4.84E-02 |
| UDO99-019     | 97-161          | 6                 | 0.167 | 0.252 | 0.388  | 0.09   | 0.284 | 5.04E-01 |
| UDO99-024     | 161-201         | 12                | 0.417 | 0.725 | 0.361  | 0.153  | 0.713 | 9.80E-02 |
| UDO99-039     | 105-194         | 17                | 0.381 | 0.806 | 0.464  | 0.208  | 0.801 | 5.14E-02 |
| UDO99-043     | 161-221         | 23                | 0.870 | 0.872 | 0.043  | 0.019  | 0.873 | 2.14E-02 |
| <b>Mean</b>   |                 | 13.64             | 0.698 | 0.740 | 0.079  |        | 0.723 | 1.09E-01 |
| <b>Min</b>    |                 | 4                 | 0.167 | 0.252 | -0.111 | -0.048 | 0.284 | 2.14E-02 |
| <b>Max</b>    |                 | 31                | 0.954 | 0.872 | 0.508  | 0.208  | 0.873 | 5.04E-01 |
